# Supplementary material
Source: Springer Nature journal article supplement (https://www.springermedizin.de/resource/supplementary/12889_2010_2889_MOESM2_ESM.pdf/9487566)
Supplement: MOESM2 [file 9487566]

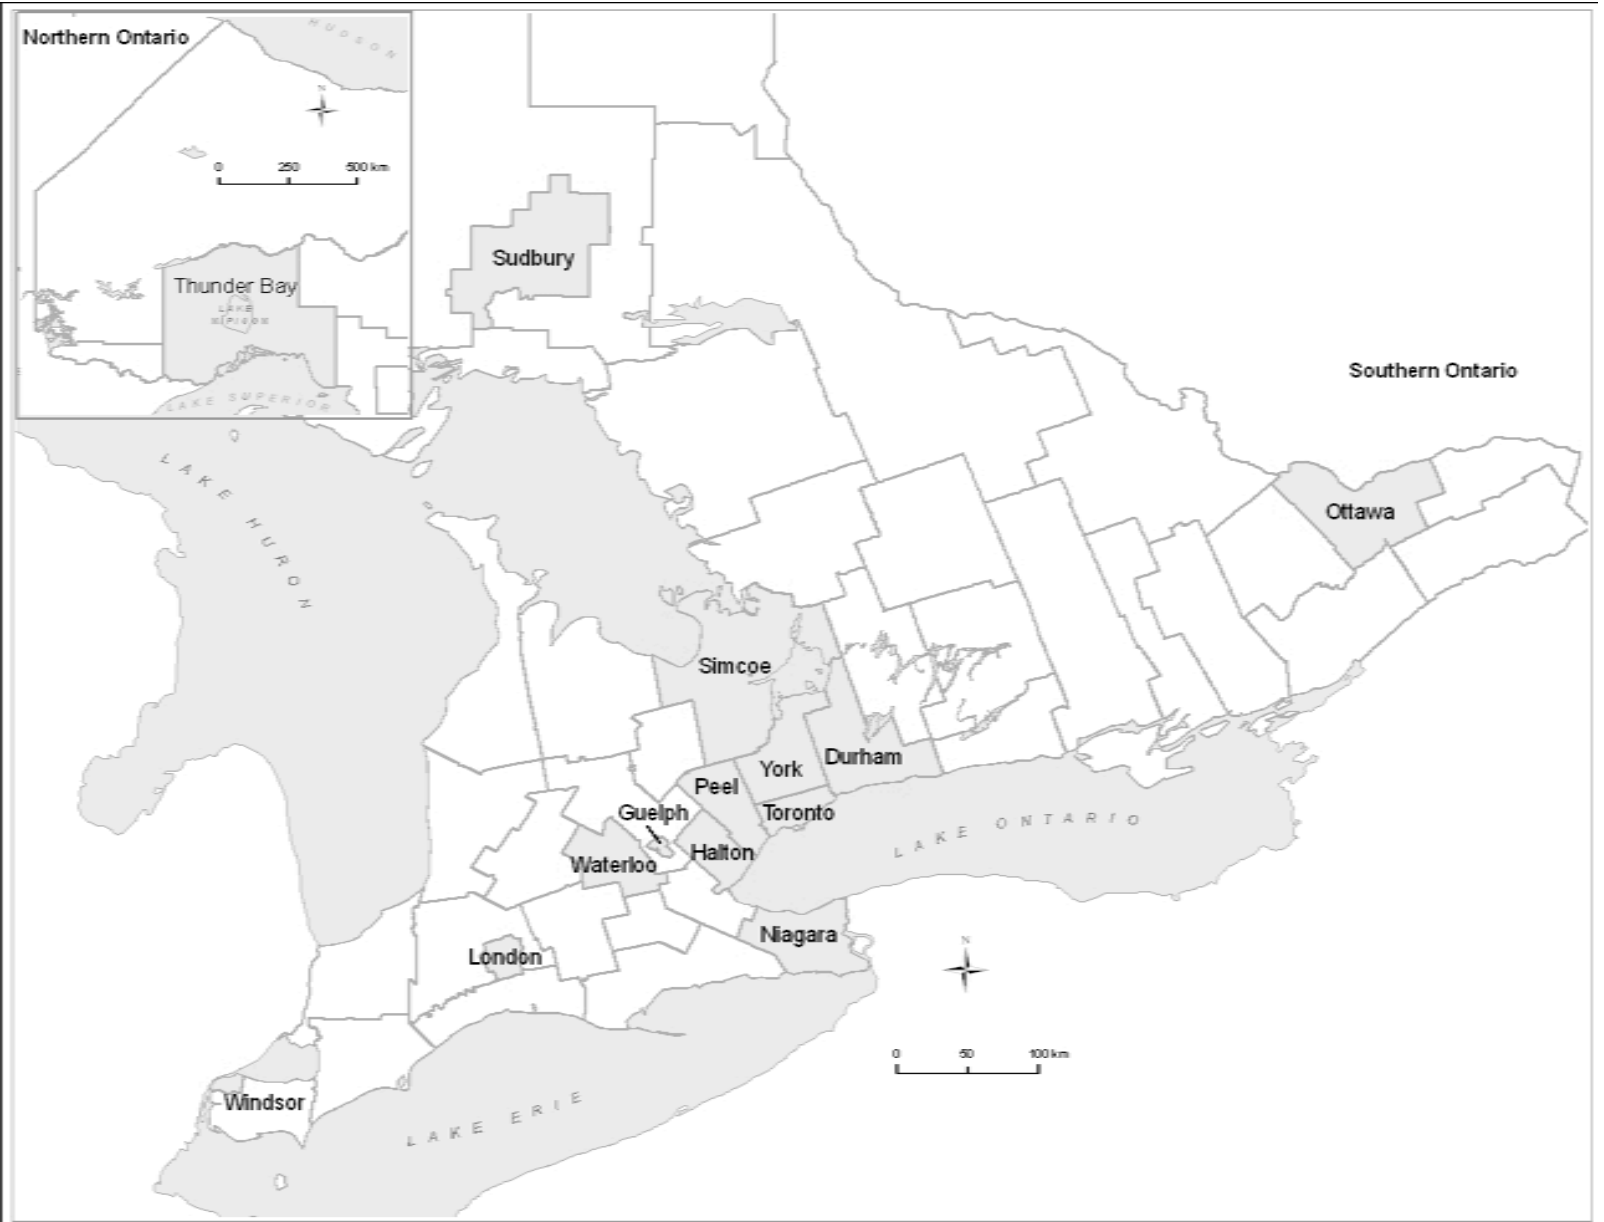

Northern Ontario

Thunder Bay

Sudbury

Southern Ontario

Ottawa

Simcoe

Guelph

Waterloo

London

Windsor

Halton

Niagara

Toronto

Peel

York

Durham

LAKE ONTARIO

LAKE HURON

LAKE SUPERIOR

LAKE ERIE

HUDSON

0 250 500 km

0 50 100 km
